# Supplementary material for: The effect of forced choice on facial emotion recognition: a comparison to open verbal classification of emotion labels
Source: PubMed Central journal article supplement — Psychosoc Med. 2013 Jun 17;10:Doc04. doi: 10.3205/psm000094 (PMC3687244; doi:10.3205/psm000094), 2013-06-17
Supplement: PSM-10-04-s-001.pdf [file PSM-10-04-s-001.pdf]

## Appendix A: Emotional labels (in German, terms were not translated due to language differences)

| Angst (Fear)                                        | Ärger (Anger)                              | Ekel (Disgust)   | Freude (Happiness)          | Trauer (Sadness)                                       | Überraschung (Surprise)           | Pos. Emotion                    | Neg. Emotion                   |
|-----------------------------------------------------|--------------------------------------------|------------------|-----------------------------|--------------------------------------------------------|-----------------------------------|---------------------------------|--------------------------------|
| Angespannt                                          | Aggressiv                                  | Abscheu          | Amüsiert sein               | Bedrückt                                               | <b>Ahnungslosigkeit</b>           | Bemüht freundlich zu sein       | Abgespannt                     |
| Angst                                               | Aggressivität                              | Angeekelt        | Belustigung                 | Deprimiert                                             | <b>Beim Sehtest</b>               | Entschlossenheit                | Ablehnend                      |
| Ängstlich                                           | Ärger                                      | Angewidert       | Erfreut                     | Enttäuschung                                           | "Bitte?"                          | Erkenntnis                      | Ablehnung                      |
| Besorgnis                                           | Ärgerlich                                  | Ekel             | Freude                      | Enttäuscht                                             | <b>"Da fehlen mir die Worte!"</b> | <b>Erwartend</b>                | Abneigung                      |
| Besorgt                                             | Auf etwas böse                             | Lustig angeekelt | <b>Freundlich zugewandt</b> | Jemand der traurig ist, das aber nicht rauslassen will |                                   |                                 | Anstrengung                    |
| <b>Bestürzung</b>                                   | Aufgebracht                                | Schlimmer Ekel   | Froh                        | <b>Mutlos</b>                                          | Erstaunen                         | <b>Fokussiert</b>               | Argwohn                        |
| <b>Bestürzt</b>                                     | Böse                                       |                  |                             | Niedergeschlagenheit                                   | <b>"Es nicht glauben wollen"</b>  | Fragend                         | Argwöhnisch                    |
| <b>Eifersucht</b>                                   | Böse auf etwas                             |                  | Fröhlich                    | Resignation                                            | Freudige Überraschung             | Freundlich gucken               | Aua, das hat weh getan         |
| Entsetzen                                           | <b>Das darf doch jetzt nicht wahr sein</b> |                  | Glücklich                   |                                                        |                                   | <b>Gönnerrhaft</b>              | Beleidigt                      |
| <b>Entsetzt</b>                                     | "das stinkt mir"                           |                  | <b>Grimasse</b>             | Schluchzend                                            | Freudig überrascht                |                                 | Desinteressiert                |
| Erschrecken                                         | <b>Eingeschnappt</b>                       |                  | Humor                       | Großes                                                 | Erstaunen                         | <b>Herzlich</b>                 | Ernst                          |
| Erschrocken                                         | Empörung                                   |                  | Offen freundlich            | Schmerz                                                | "Hää?"                            | <b>Herzlich offen</b>           | Geblendet (vom Licht)          |
| Erschrockene Angst                                  | Frustriert                                 |                  | Toooooor!                   | Schwer-mut                                             | "Hey, du hier?"                   | Höflich                         |                                |
| Erschrockenheit                                     | Genervt                                    |                  |                             | Sehr traurig                                           | <b>Irritation</b>                 | <b>Interesse</b>                | Gelangweilt                    |
| Erschreckt                                          |                                            |                  |                             | Trauer                                                 | Negativ überrascht                | Ironie                          | Gestelltes Grinsen             |
| <b>Ersticken</b>                                    | <b>Gereizt</b>                             |                  |                             | Traurigkeit                                            | Negative Überraschung             | Konzentration                   | Gier                           |
| Furcht                                              | Grummel                                    |                  |                             | Tröstlos                                               | <b>"Oops"</b>                     | Konzentriert                    | Gleichgültig                   |
|                                                     | <b>Hass</b>                                |                  |                             | Unglücklich                                            | <b>Schock</b>                     | <b>Nachdenklich</b>             | Gleichgültigkeit               |
| "Jetzt ist mir das teure Porzellan runtergefallen"  | <b>"Ich hab Scheiße gebaut!"</b>           |                  |                             |                                                        |                                   | Neutral                         | Heimtücke                      |
| Leicht ängstlich                                    | Leicht                                     |                  |                             | <b>Verzweifeln</b>                                     | <b>Schockiert</b>                 |                                 | Hilflos                        |
| <b>erschrocken</b>                                  | aggressiv                                  |                  |                             | <b>Verzweifelt</b>                                     | <b>Spannung</b>                   | Normal                          |                                |
| (negative) Überraschung, i.S. von erschreckt werden | Leicht wütend                              |                  |                             | <b>Verzweiflung</b>                                    | <b>Sprachlos</b>                  | <b>Offen Sympathie</b>          | <b>Hundeblick</b>              |
| Panik                                               | Mädchen-Wut                                |                  |                             |                                                        |                                   |                                 | Jemand der etwas nicht kapiert |
|                                                     | Mucksch                                    |                  |                             |                                                        | Staunen                           | Überlegend                      | Kritisch                       |
| <b>Panisch</b>                                      |                                            |                  |                             |                                                        | Stutzig                           | <b>Völlige Ahnungslosigkeit</b> | Künstliches Lächeln            |
| <b>Schreck</b>                                      | Sauer                                      |                  |                             |                                                        | Überrascht                        | Zufrieden                       | Langeweile                     |
|                                                     | Sauer sein                                 |                  |                             |                                                        | Überraschung                      |                                 | Leicht verzweifelt             |
| <b>Schrecken</b>                                    | <b>Schmollend</b>                          |                  |                             |                                                        | Überraschung (negativ)            | Zufriedenheit                   | <b>Leicht</b>                  |
| <b>Sorge</b>                                        |                                            |                  |                             |                                                        |                                   |                                 | <b>zweifelnd</b>               |
| Verängstigt                                         | <b>Schmollig</b>                           |                  |                             |                                                        | Überrascht                        | <b>Zustimmend</b>               | <b>Leidend</b>                 |
|                                                     | <b>Trotz</b>                               |                  |                             |                                                        | Überrascht sein                   | <b>Zuversicht</b>               | Lustlosigkeit                  |
|                                                     | <b>Trotzig</b>                             |                  |                             |                                                        | <b>Überwältigt</b>                |                                 |                                |

|              |              |                |
|--------------|--------------|----------------|
| Unglaublich  | Unverhoffte  | Magenbe-       |
| verärgert    | Freude       | schwerden      |
| Unmut        | Verblüffung  | Missmutig      |
| Unzufrieden  | Verdutzt     | Missmutigkeit  |
| Unzufrieden- |              |                |
| heit         | Verwundert   | Misstrauen     |
| Verärgert    | Verwunderung | Mitleid        |
| Verärgerung  |              | Mitleid zeigen |
| Verbissen    |              | Mitleidig      |
| Wut          |              | Müde           |
|              |              | Nach Box-      |
| Wütend       |              | Kampf          |
| Zorn         |              | Negativ        |
| Zornig       |              | Neid           |
|              |              | Nicht          |
|              |              | verstehend     |
|              |              | Orientierungs- |
|              |              | los            |
|              |              | Schadenfreude  |
|              |              | Schadenfroh    |
|              |              | Scham          |
|              |              | "schlappi"     |
|              |              | Schlecht       |
|              |              | gelaunt        |
|              |              | Schlechte      |
|              |              | Laune          |
|              |              | Schuldgefühl   |
|              |              | Sehtest        |
|              |              | Selbstmitleid  |
|              |              | Skepsis        |
|              |              | Skepsis ("Ob   |
|              |              | das wohl       |
|              |              | stimmt?")      |
|              |              | Skeptisch      |
|              |              | Spöttisch      |
|              |              | Überarbeitet   |
|              |              | Überfordert    |
|              |              | Unangenehm     |
|              |              | Unangenehm     |
|              |              | berührt        |
|              |              | Unbehagen      |
|              |              | Unent-         |
|              |              | schlossen      |
|              |              | Unglaube       |
|              |              | Ungläubig      |
|              |              | Ungläubigkeit  |
|              |              | Unlust         |
|              |              | Unschlüssig    |
|              |              | Unsicher       |
|              |              | Unsicherheit   |
|              |              | Unverständnis  |
|              |              | Verachtung     |
|              |              | Verbittert     |
|              |              | Verschlossen-  |
|              |              | heit           |
|              |              | Verwirrt       |
|              |              | Verwirrung     |
|              |              | Vorgetäuschte  |
|              |              | Freude         |
|              |              | Widerwille     |
|              |              | Widerwillen    |
|              |              | Zweifel        |
|              |              | Zweifeln       |
|              |              | Zweifelnd      |
|              |              | Zweifelnd      |
|              |              | mutlos         |

Black: accordance in first rating

rot: accordance with „forced choice“
